# Supplementary material
Source: PubMed Central journal article supplement (PMC3019246)
Supplement: NIHMS220541-supplement-1_si_001.pdf [file NIHMS220541-supplement-1_si_001.pdf]

# Versatile Small Molecule Motifs for Self-assembly in Water and Formation of Biofunctional Supramolecular Hydrogels

Ye Zhang, Yi Kuang, Yuan Gao, Bing Xu\*

Supporting information

Scheme S1. The synthetic route of **1**.

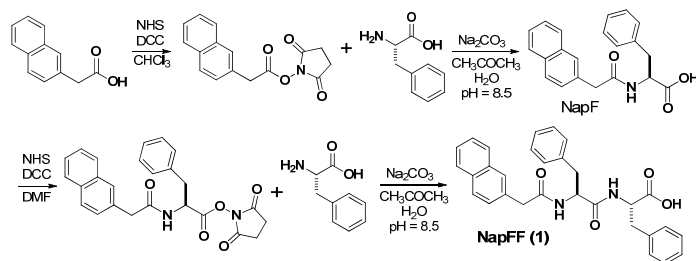

Scheme S2. The synthetic route of **2**.

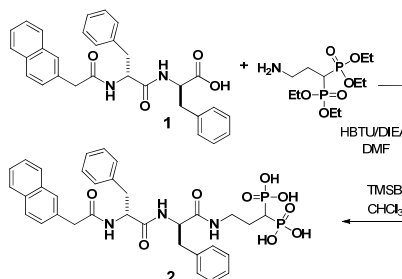

Scheme S3. Synthesis of the conjugate of NapFF and taxol.

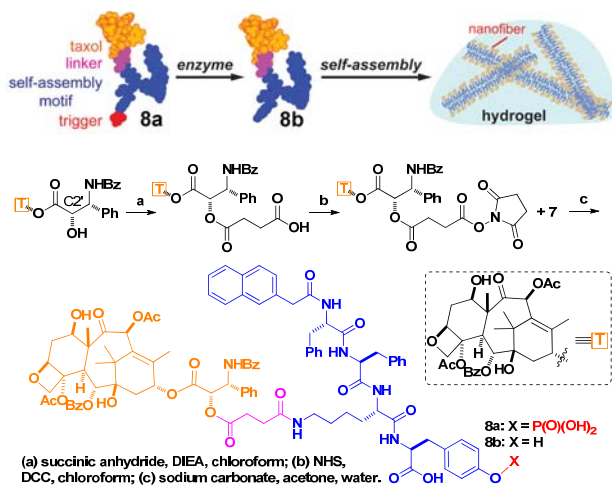

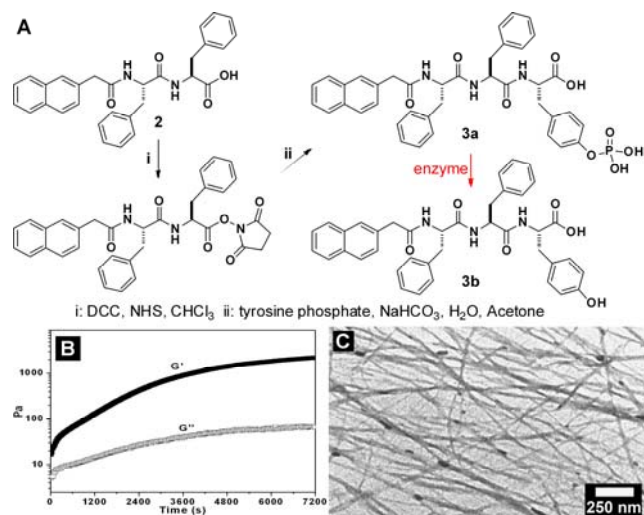

**Figure S1.** (A) The synthesis of **3a** and its enzymatic conversion. (B) dynamic time sweep of the solution containing 0.5 wt% (6.91 mM) of **3a** at pH 4.8 and 10  $\mu\text{L}$  of acid phosphatase (5.88 U/mL) at the strain of 1.0% and the frequency of 2.0 rad/s. (C) TEM of the hydrogel made by acid phosphatase to convert **3a** to **3b**.

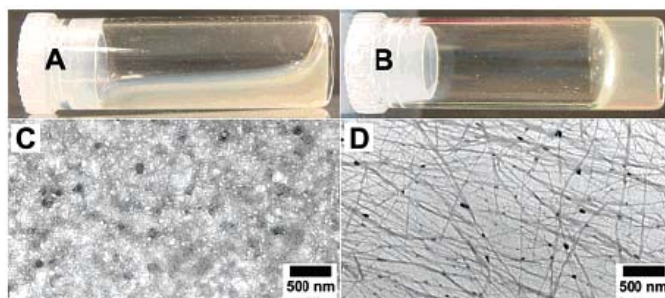

**Figure S2.** The optical and the TEM images of viscous solution of **5a** (A, C) and the hydrogel formed by **5b** (B, D). Adapted with permission from ref. 20. Copyright ACS 2007.

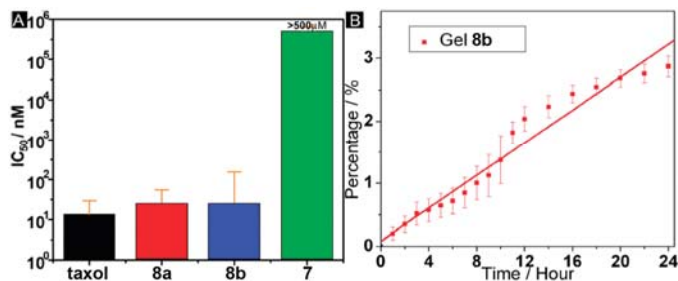

**Figure S3.** (A) Cytotoxicity (y-axis in log10 scale) of taxol (**1**), **8a**, **8b**, and **7** after incubated with HeLa cells for 48 h and (B) accumulative drug release profile of taxol gels.

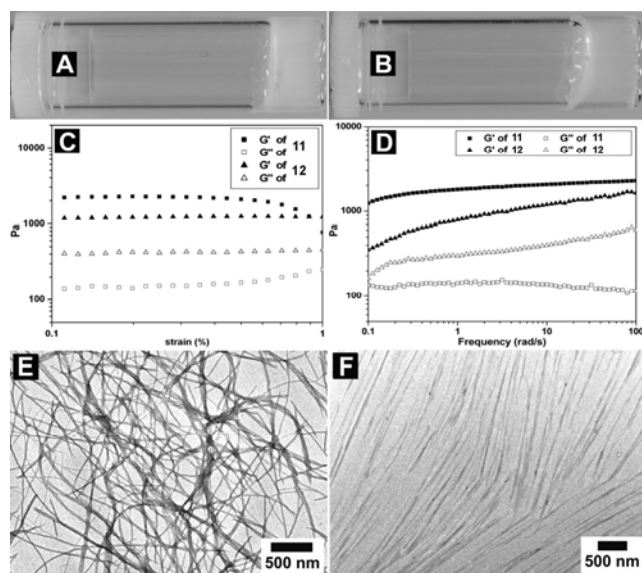

**Figure S4.** Optical images of (A) the hydrogel of **11** and (B) the hydrogel of **12**, (C) strain and (D) frequency dependence of dynamic storage moduli ( $G'$ ) and loss moduli ( $G''$ ) of the hydrogels, TEM images of (E) the hydrogel of **11** and (F) the hydrogel of **12**. Adapted with permission from ref.26. Copyright RSC 2007.
